# Supplementary material for: Genotype and Successive Harvests Interaction Affects Phenolic Acids and Aroma Profile of Genovese Basil for Pesto Sauce Production
Source: MDPI journal article supplement (doi:10.3390/foods10020278), 2021-01-30
Supplement: s1 [file s1]

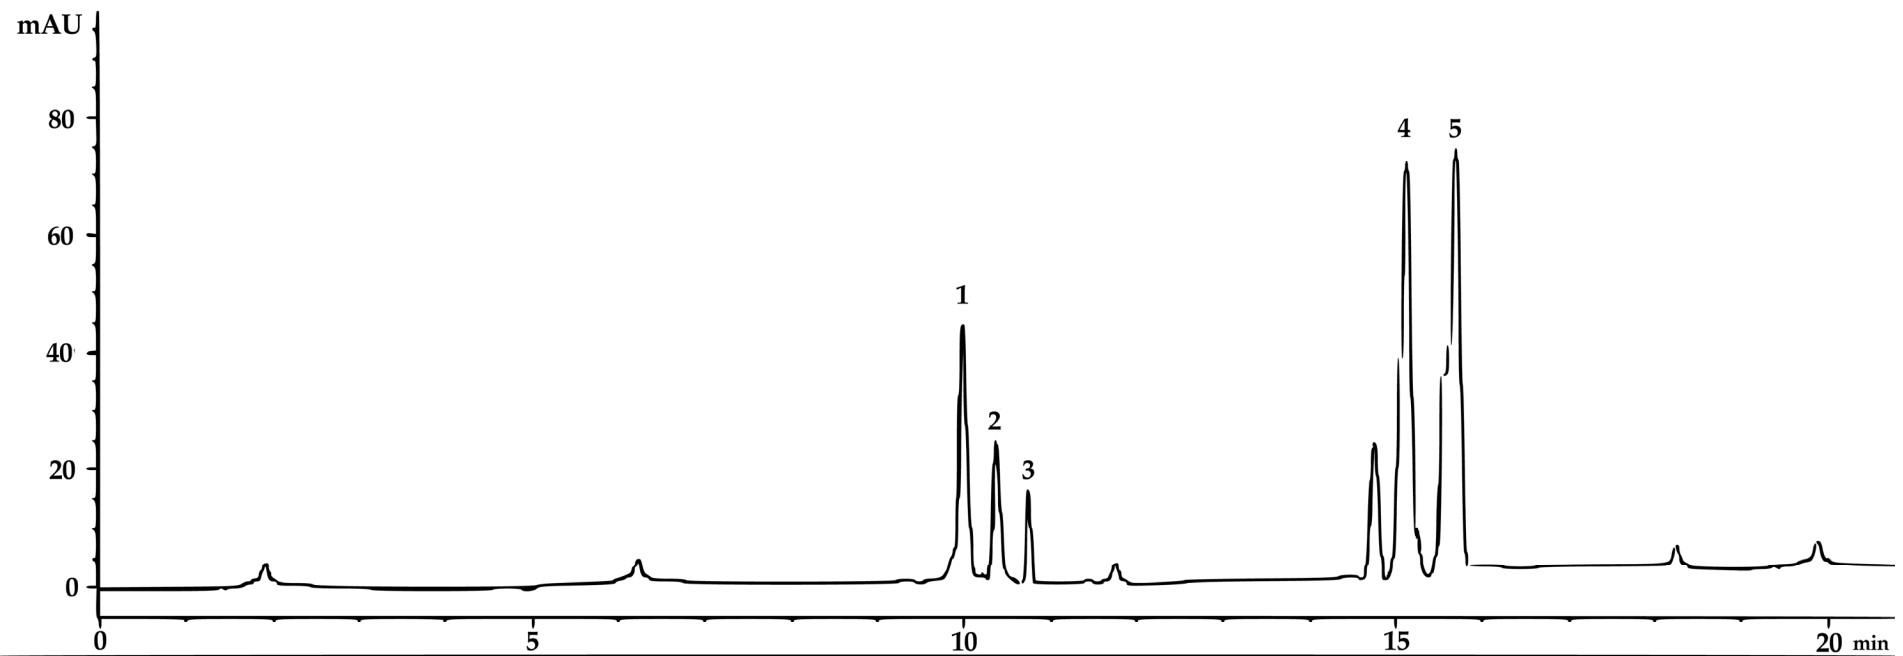

**Figure S1.** Separation of caffeic acid (1), p-Coumaric acid (2), ferulic acid (3), chicoric acid (4), and rosmarinic acid (5) in Genovese basil extract by HPLC.
